# Supplementary material for: A Network Pharmacology Approach to Evaluating the Efficacy of Chinese Medicine Using Genome-Wide Transcriptional Expression Data
Source: Evid Based Complement Alternat Med. 2013 May 12;2013:915343. doi: 10.1155/2013/915343 (PMC3666440; doi:10.1155/2013/915343)
Supplement: Supplementary file 1 — Supplement Table: Detailed information of 27 enriched pathways. KEGG pathway analysis tools embedded in ArrayTrack were used for pathway analysis, and pathway with Fisher p-value <0.05 was identified as the enriched pathway. 27 enriched pathways were eventually identified and their detailed information was listed in Supplement Table . [file 915343.f1.xlsx]

## Sheet: Sheet1
Pathway name	KEGG id	GO Function	P-value
ECM-receptor interaction	rno04512	Signaling Molecules and Interaction/Environmental Information Processing	0
Focal adhesion	rno04510	Cell Communication/Cellular Processes	1e-08
Dilated cardiomyopathy	rno05414	Circulatory Diseases/Human Diseases	5.298e-05
Hypertrophic cardiomyopathy	rno05410	Circulatory Diseases/Human Diseases	0.00028119
Fc gamma R-mediated phagocytosis	rno04666	Immune System/Cellular Processes	0.00039527
Galactose metabolism	rno00052	Carbohydrate Metabolism/Metabolism	0.00056773
TGF-beta signaling pathway	rno04350	Signal Transduction/Environmental Information Processing	0.00081202
Lysosome	rno04142	Transport and Catabolism/Cellular Processes	0.00129891
Amino sugar and nucleotide sugar metabolism	rno00520	Carbohydrate Metabolism/Metabolism	0.00135021
Regulation of actin cytoskeleton	rno04810	Cell Motility/Cellular Processes	0.00138745
N-Glycan biosynthesis	rno00510	Glycan Biosynthesis and Metabolism/Metabolism	0.00160331
Nicotinate and nicotinamide metabolism	rno00760	Metabolism of Cofactors and Vitamins/Metabolism	0.0136815
Ether lipid metabolism	rno00565	Lipid Metabolism/Metabolism	0.0170211
Arrhythmogenic right ventricular cardiomyopathy	rno05412	Circulatory Diseases/Human Diseases	0.020763
Arginine and proline metabolism	rno00330	Amino Acid Metabolism/Metabolism	0.0207685
Gap junction	rno04540	Cell Communication/Cellular Processes	0.0226223
Purine metabolism	rno00230	Nucleotide Metabolism/Metabolism	0.0242753
Adipocytokine signaling pathway	rno04920	Endocrine System/Cellular Processes	0.0263696
DNA replication	rno03030	Replication and Repair/Genetic Information Processing	0.0288191
Valine, leucine and isoleucine biosynthesis	rno00290	Amino Acid Metabolism/Metabolism	0.029465
Chemokine signaling pathway	rno04062	Immune System/Cellular Processes	0.032703
Complement and coagulation cascades	rno04610	Immune System/Cellular Processes	0.0339206
Cell cycle	rno04110	Cell Growth and Death/Cellular Processes	0.0343228
Pyrimidine metabolism	rno00240	Nucleotide Metabolism/Metabolism	0.0374797
Chondroitin sulfate biosynthesis	rno00532	Glycan Biosynthesis and Metabolism/Metabolism	0.041992
Thyroid cancer	rno05216	Cancers/Human Diseases	0.045456
p53 signaling pathway	rno04115	Cell Growth and Death/Cellular Processes	0.0496038
